# Supplementary material
Source: publisher figshare collection journal article supplement (https://tandf.figshare.com/articles/dataset/_/3472799)
Supplement: Supplementary file 1 [file 1]

## **Evidence for hybridisation in the Tynong Province granitoids, Lachlan Fold Belt, eastern Australia**

K. R. Regmi<sup>a,b</sup>, R. F. Weinberg<sup>a\*</sup>, I. A. Nicholls<sup>a</sup>, R. Maas<sup>c</sup>, and M. Raveggi<sup>a</sup>

<sup>a</sup> School of Earth, Atmosphere and Environment, Monash University, Clayton, VIC 3800, Australia

<sup>b</sup> Department of Geology, Faculty of Science, University of Namibia, Windhoek, Namibia

<sup>c</sup> School of Earth Sciences, University of Melbourne, VIC 3010, Australia

\*Corresponding author, e-mail address: [Roberto.weinberg@monash.edu](mailto:Roberto.weinberg@monash.edu), tel: +61-3-99054902

### **SUPPLEMENTARY PAPERS**

*Australian Journal of Earth Sciences* (2016) **63**,  
<http://dx.doi.org/10.1080/08120099.2016.1180321>

---

Copies of Supplementary Papers may be obtained from the Geological Society of Australia's website ([www.gsa.org.au](http://www.gsa.org.au)), the Australian Journal of Earth Sciences website ([www.ajes.com.au](http://www.ajes.com.au)) or from the National Library of Australia's Pandora archive (<http://nla.gov.au/nla.arc-25194>).

---

### **SUPPLEMENTARY PAPERS**

Table 1 U–Pb isotope data for the Toorongo pluton (sample 406).

Table 2 U–Pb isotope data for the Tynong pluton (sample TYN5).

Table 3 Major and trace element data for the Tynong Province granitoids.

Table 4 Lu and Hf isotopic data for zircons from one sample of the Toorongo (sample 406, 37°48'41"S, 146°05'40"E), and two samples from the Tynong pluton (samples 2803-8 and TYN5, 38°03'30"S, 145°37'26"E), Lachlan Orogen, eastern Australia.

Table 1 U–Pb isotope data for the Toorongu pluton (sample 406).

|                      | $^{238}\text{U}/^{206}\text{Pb}$ | 2 s           | $^{207}\text{Pb}/^{206}\text{Pb}$ | 2 s           | $^{238}\text{U}/^{206}\text{Pb}$<br>ages (Ma) | 2 s       | $^{207}\text{Pb}$<br>corrected<br>ages (Ma) | 2 s*      | Comment                                |
|----------------------|----------------------------------|---------------|-----------------------------------|---------------|-----------------------------------------------|-----------|---------------------------------------------|-----------|----------------------------------------|
| KR09020406-2r        | 17.1409                          | 0.3232        | 0.0556                            | 0.0020        | 366                                           | 13        | 365                                         | 22        | OK                                     |
| KR09020406-3         | 16.1629                          | 0.3083        | 0.0549                            | 0.0023        | 387                                           | 14        | 387                                         | 23        | OK                                     |
| KR09020406-3c        | 16.0308                          | 0.3803        | 0.0567                            | 0.0041        | 390                                           | 18        | 389                                         | 25        | OK                                     |
| KR09020406-4         | 16.5371                          | 0.3063        | 0.0530                            | 0.0019        | 378                                           | 13        | 379                                         | 22        | OK                                     |
| KR09020406-4-2       | 16.8294                          | 0.3172        | 0.0545                            | 0.0020        | 372                                           | 13        | 372                                         | 22        | OK                                     |
| KR09020406-5         | 17.3641                          | 0.4221        | 0.0544                            | 0.0037        | 361                                           | 17        | 361                                         | 24        | OK                                     |
| KR09020406-6r        | 16.1943                          | 0.3095        | 0.0542                            | 0.0021        | 386                                           | 14        | 386                                         | 23        | OK                                     |
| KR09020406-6c        | 16.3586                          | 0.3158        | 0.0632                            | 0.0026        | 382                                           | 14        | 378                                         | 23        | OK                                     |
| KR09020406-7r        | 16.4177                          | 0.3181        | 0.0612                            | 0.0025        | 381                                           | 14        | 378                                         | 23        | OK                                     |
| KR09020406-8c        | 16.3345                          | 0.3042        | 0.0597                            | 0.0021        | 383                                           | 14        | 381                                         | 23        | OK                                     |
| KR09020406-8r        | 17.4064                          | 0.3272        | 0.0548                            | 0.0019        | 360                                           | 13        | 360                                         | 21        | OK                                     |
| KR09020406-9r        | 16.1499                          | 0.3182        | 0.0524                            | 0.0025        | 387                                           | 15        | 388                                         | 23        | OK                                     |
| KR09020406-10c       | 16.0282                          | 0.3340        | 0.0564                            | 0.0026        | 390                                           | 15        | 389                                         | 24        | OK                                     |
| KR09020406-11r       | 17.6772                          | 0.3375        | 0.0611                            | 0.0024        | 355                                           | 13        | 352                                         | 21        | OK                                     |
| KR09020406-11c       | 17.5039                          | 0.3860        | 0.0664                            | 0.0033        | 358                                           | 15        | 353                                         | 23        | OK                                     |
| KR09020406-12r       | 17.0068                          | 0.3297        | 0.0540                            | 0.0021        | 368                                           | 14        | 368                                         | 22        | OK                                     |
| KR09020406-12c       | 16.5453                          | 0.3778        | 0.0549                            | 0.0034        | 378                                           | 16        | 378                                         | 24        | OK                                     |
| KR09020406-13r       | 17.2147                          | 0.3615        | 0.0575                            | 0.0028        | 364                                           | 15        | 362                                         | 22        | OK                                     |
| KR09020406-14        | 16.7588                          | 0.3820        | 0.0535                            | 0.0029        | 374                                           | 16        | 374                                         | 24        | OK                                     |
| KR09020406-15r       | 16.5536                          | 0.3343        | 0.0595                            | 0.0027        | 378                                           | 15        | 376                                         | 23        | OK                                     |
| KR09020406-15c       | 15.9566                          | 0.3514        | 0.0540                            | 0.0031        | 392                                           | 16        | 392                                         | 25        | OK                                     |
| KR09020406-16        | 17.0707                          | 0.3613        | 0.0630                            | 0.0027        | 367                                           | 15        | 363                                         | 23        | OK                                     |
| KR09020406-17r       | 17.4948                          | 0.3367        | 0.0526                            | 0.0020        | 358                                           | 13        | 359                                         | 21        | OK                                     |
| KR09020406-17c       | 17.3943                          | 0.3752        | 0.0526                            | 0.0025        | 360                                           | 15        | 361                                         | 22        | OK                                     |
| KR09020406-18r       | 16.7701                          | 0.3656        | 0.0627                            | 0.0029        | 373                                           | 15        | 369                                         | 23        | OK                                     |
| KR09020406-19-2      | 17.6616                          | 0.3806        | 0.0584                            | 0.0030        | 355                                           | 15        | 353                                         | 22        | OK                                     |
| KR09020406-20        | 16.7112                          | 0.3351        | 0.0562                            | 0.0025        | 375                                           | 14        | 374                                         | 23        | OK                                     |
| <u>KR09020406-25</u> | <u>14.7254</u>                   | <u>0.2992</u> | <u>0.0604</u>                     | <u>0.0028</u> | <u>424</u>                                    | <u>16</u> | <u>421</u>                                  | <u>26</u> | <u>Older age, possible inheritance</u> |

|                       | $^{238}\text{U}/^{206}\text{Pb}$ | 2 s           | $^{207}\text{Pb}/^{206}\text{Pb}$ | 2 s           | $^{238}\text{U}/^{206}\text{Pb}$<br>ages (Ma) | 2 s       | $^{207}\text{Pb}$<br>corrected<br>ages (Ma) | 2 s*      | Comment                                |
|-----------------------|----------------------------------|---------------|-----------------------------------|---------------|-----------------------------------------------|-----------|---------------------------------------------|-----------|----------------------------------------|
| KR09020406-26         | 16.8209                          | 0.3339        | 0.0543                            | 0.0025        | 372                                           | 14        | 372                                         | 22        | OK                                     |
| <i>KR09020406-30</i>  | <i>12.1551</i>                   | <i>0.2275</i> | <i>0.0570</i>                     | <i>0.0017</i> | <i>510</i>                                    | <i>18</i> | <i>510</i>                                  | <i>30</i> | <i>Older age, possible inheritance</i> |
| KR09020406-31r        | 18.0636                          | 0.3524        | 0.0559                            | 0.0021        | 347                                           | 13        | 346                                         | 21        | OK                                     |
| KR09020406-32         | 17.1880                          | 0.3486        | 0.0548                            | 0.0023        | 365                                           | 14        | 364                                         | 22        | OK                                     |
| KR09020406-33         | 17.2325                          | 0.3801        | 0.0582                            | 0.0028        | 364                                           | 15        | 362                                         | 23        | OK                                     |
| KR09020406-34r        | 16.5180                          | 0.3220        | 0.0572                            | 0.0019        | 379                                           | 14        | 378                                         | 23        | OK                                     |
| KR09020406-35c        | 16.2866                          | 0.3130        | 0.0548                            | 0.0020        | 384                                           | 14        | 384                                         | 23        | OK                                     |
| KR09020406-35r        | 16.6445                          | 0.3269        | 0.0546                            | 0.0020        | 376                                           | 14        | 376                                         | 23        | OK                                     |
| <i>KR09020406-36</i>  | <i>15.4392</i>                   | <i>0.3146</i> | <i>0.0604</i>                     | <i>0.0026</i> | <i>405</i>                                    | <i>16</i> | <i>402</i>                                  | <i>25</i> | <i>Older age, possible inheritance</i> |
| KR09020406-37         | 17.2028                          | 0.3788        | 0.0557                            | 0.0030        | 364                                           | 15        | 363                                         | 23        | OK                                     |
| KR09020406-39         | 16.3827                          | 0.3113        | 0.0549                            | 0.0020        | 382                                           | 14        | 382                                         | 23        | OK                                     |
| KR09020406-41r        | 16.7029                          | 0.3180        | 0.0517                            | 0.0019        | 375                                           | 14        | 376                                         | 22        | OK                                     |
| KR09020406-42         | 16.2602                          | 0.3226        | 0.0525                            | 0.0023        | 385                                           | 15        | 386                                         | 23        | OK                                     |
| KR09020406-43r        | 17.3551                          | 0.3313        | 0.0518                            | 0.0019        | 361                                           | 13        | 362                                         | 21        | OK                                     |
| <i>KR09020406-43c</i> | <i>14.9633</i>                   | <i>0.3045</i> | <i>0.0585</i>                     | <i>0.0023</i> | <i>417</i>                                    | <i>16</i> | <i>415</i>                                  | <i>25</i> | <i>Older age, possible inheritance</i> |
| KR09020406-44r        | 16.8862                          | 0.3194        | 0.0527                            | 0.0018        | 371                                           | 13        | 371                                         | 22        | OK                                     |
| KR09020406-44c        | 16.2760                          | 0.3179        | 0.0528                            | 0.0020        | 384                                           | 14        | 385                                         | 23        | OK                                     |
| KR09020406-45         | 16.4123                          | 0.3178        | 0.0522                            | 0.0021        | 381                                           | 14        | 382                                         | 23        | OK                                     |

2 s\* is the cumulative error reported as the square root of the sum of the squares of the internal precision and external precision (4.7% on the  $^{238}\text{U}/^{206}\text{Pb}$  of the standard 91500). Analyses in italics and underlined were not used in age calculations, notice that four of them are interpreted to represent inheritance (>400 Ma).

Table 2 U–Pb isotope data for the Tynong pluton (sample TYN5).

|                | $^{238}\text{U}/^{206}\text{Pb}$ | 2 s           | $^{207}\text{Pb}/^{206}\text{Pb}$ | 2 s           | $^{238}\text{U}/^{206}\text{Pb}$<br>ages (Ma) | 2 s       | $^{207}\text{Pb}$<br>corrected<br>ages (Ma) | 2 s*      | Comment                     |
|----------------|----------------------------------|---------------|-----------------------------------|---------------|-----------------------------------------------|-----------|---------------------------------------------|-----------|-----------------------------|
| <i>Tyn5-1C</i> | <u>20.0844</u>                   | <u>0.5002</u> | <u>0.0578</u>                     | <u>0.0041</u> | <u>313</u>                                    | <u>8</u>  | <u>311</u>                                  | <u>16</u> | <i>Pb loss?</i>             |
| Tyn5-2         | 18.1159                          | 0.4201        | 0.0716                            | 0.0038        | 346                                           | 8         | 339                                         | 18        | OK                          |
| Tyn5-3r        | 18.0310                          | 0.5072        | 0.0636                            | 0.0058        | 348                                           | 10        | 344                                         | 19        | OK                          |
| <i>Tyn5-3c</i> | <u>21.2993</u>                   | <u>0.6442</u> | <u>0.1082</u>                     | <u>0.0088</u> | <u>296</u>                                    | <u>9</u>  | <u>274</u>                                  | <u>15</u> | <i>Discordant/Common Pb</i> |
| <i>Tyn5-4c</i> | <u>16.3666</u>                   | <u>0.5572</u> | <u>0.0985</u>                     | <u>0.0099</u> | <u>382</u>                                    | <u>13</u> | <u>362</u>                                  | <u>21</u> | <i>Discordant/Common Pb</i> |
| Tyn5-4r        | 16.8776                          | 0.4273        | 0.0663                            | 0.0043        | 371                                           | 9         | 365                                         | 19        | OK                          |
| Tyn5-5         | 17.7683                          | 0.4420        | 0.0573                            | 0.0038        | 353                                           | 9         | 351                                         | 19        | OK                          |
| <i>Tyn5-6</i>  | <u>14.7536</u>                   | <u>0.4832</u> | <u>0.1249</u>                     | <u>0.0122</u> | <u>423</u>                                    | <u>13</u> | <u>387</u>                                  | <u>23</u> | <i>Discordant/Common Pb</i> |
| Tyn5-7r        | 15.9795                          | 0.3881        | 0.0772                            | 0.0046        | 391                                           | 9         | 380                                         | 20        | OK                          |
| Tyn5-7c        | 16.6973                          | 0.4405        | 0.0582                            | 0.0043        | 375                                           | 10        | 373                                         | 20        | OK                          |
| <i>Tyn5-8</i>  | <u>16.4312</u>                   | <u>0.6048</u> | <u>0.1333</u>                     | <u>0.0143</u> | <u>381</u>                                    | <u>14</u> | <u>344</u>                                  | <u>21</u> | <i>Discordant/Common Pb</i> |
| Tyn5-9         | 15.8028                          | 0.5494        | 0.0566                            | 0.0064        | 396                                           | 13        | 395                                         | 23        | OK                          |
| Tyn5-10        | 15.3421                          | 0.3813        | 0.0885                            | 0.0052        | 407                                           | 10        | 390                                         | 21        | OK                          |
| Tyn5-11        | 15.9744                          | 0.4083        | 0.0593                            | 0.0037        | 391                                           | 10        | 389                                         | 21        | OK                          |
| Tyn5-12        | 17.7620                          | 0.5553        | 0.0902                            | 0.0077        | 353                                           | 11        | 337                                         | 19        | OK                          |
| Tyn5-13        | 16.9119                          | 1.1097        | 0.0723                            | 0.0165        | 370                                           | 24        | 362                                         | 29        | Short acquisition but OK    |
| Tyn5-14        | 17.4398                          | 0.4136        | 0.0649                            | 0.0036        | 359                                           | 8         | 354                                         | 19        | OK                          |
| Tyn5-15        | 17.0474                          | 0.6277        | 0.0525                            | 0.0063        | 367                                           | 13        | 368                                         | 22        | OK                          |
| Tyn5-16        | 17.3943                          | 0.6112        | 0.0546                            | 0.0062        | 360                                           | 12        | 360                                         | 21        | OK                          |
| <i>Tyn5-17</i> | <u>16.4799</u>                   | <u>0.4889</u> | <u>0.1403</u>                     | <u>0.0106</u> | <u>380</u>                                    | <u>11</u> | <u>340</u>                                  | <u>19</u> | <i>Discordant/Common Pb</i> |
| Tyn5-18        | 16.2813                          | 0.4612        | 0.0728                            | 0.0056        | 384                                           | 11        | 376                                         | 21        | OK                          |
| Tyn5-19        | 16.8606                          | 0.4662        | 0.0900                            | 0.0067        | 371                                           | 10        | 355                                         | 19        | OK                          |
| Tyn5-20r       | 17.4581                          | 0.8168        | 0.0625                            | 0.0104        | 359                                           | 16        | 355                                         | 23        | OK                          |
| Tyn5-20c       | 16.4962                          | 0.5606        | 0.0539                            | 0.0057        | 379                                           | 13        | 380                                         | 22        | OK                          |
| Tyn5-21        | 17.1733                          | 0.6724        | 0.0909                            | 0.0113        | 365                                           | 14        | 348                                         | 21        | OK                          |
| Tyn5-22        | 16.8322                          | 0.5213        | 0.0932                            | 0.0085        | 372                                           | 11        | 354                                         | 20        | OK                          |

2 s\* is the cumulative error reported as the square root of the sum of the squares of the internal precision and external precision (4.7% on the  $^{238}\text{U}/^{206}\text{Pb}$  of the standard 91500). Analyses in italics and underlined were not used in age calculations.

Table 3 Major and trace element data for the Tynong Province granitoids.

| Pluton<br>Rock type            | Lysterfield<br>Aplitic<br>dyke | Lysterfield<br>Granodiorite | Lysterfield<br>Granodiorite | Lysterfield<br>Granodiorite | Lysterfield<br>Granodiorite | Lysterfield<br>Enclave | Lysterfield<br>Enclave | Lysterfield<br>Enclave | Lysterfield<br>Enclave |
|--------------------------------|--------------------------------|-----------------------------|-----------------------------|-----------------------------|-----------------------------|------------------------|------------------------|------------------------|------------------------|
| Sample No                      | 1702-2                         | LYS1A                       | LYS3                        | LYS4                        | 1702-1                      | 1702-3A                | 1702-3B                | 1702-4                 | 1702R-5                |
| SiO <sub>2</sub>               | 76.99                          | 65.19                       | 67.99                       | 63.83                       | 67.09                       | 68.48                  | 55.07                  | 54.23                  | 59.87                  |
| TiO <sub>2</sub>               | 0.07                           | 0.8                         | 0.57                        | 0.85                        | 0.6                         | 0.59                   | 1.55                   | 1.35                   | 1                      |
| Al <sub>2</sub> O <sub>3</sub> | 12.56                          | 15.11                       | 14.72                       | 15.68                       | 14.68                       | 14.46                  | 16.12                  | 17.05                  | 16.05                  |
| Fe <sub>2</sub> O <sub>3</sub> | 0.57                           | 4.69                        | 3.65                        | 5.2                         | 4.05                        | 3.8                    | 8.38                   | 8.69                   | 7.18                   |
| MnO                            | 0.01                           | 0.06                        | 0.06                        | 0.07                        | 0.07                        | 0.06                   | 0.15                   | 0.15                   | 0.15                   |
| MgO                            | 0.26                           | 2.19                        | 1.94                        | 2.69                        | 2.09                        | 1.94                   | 4.88                   | 4.81                   | 4.18                   |
| CaO                            | 0.59                           | 3.5                         | 3.37                        | 4.24                        | 3.55                        | 3.31                   | 5.71                   | 5.43                   | 5.6                    |
| Na <sub>2</sub> O              | 2.8                            | 2.73                        | 3.43                        | 3.2                         | 2.99                        | 3                      | 3.44                   | 3.57                   | 3.58                   |
| K <sub>2</sub> O               | 5.55                           | 4.25                        | 3.52                        | 3.13                        | 3.33                        | 3.41                   | 2.96                   | 2.97                   | 1.77                   |
| P <sub>2</sub> O <sub>5</sub>  | bd                             | 0.26                        | 0.14                        | 0.24                        | 0.14                        | 0.13                   | 0.34                   | 0.4                    | 0.19                   |
| L.O.I.                         | 0.21                           | 0.82                        | 0.6                         | 0.74                        | 0.52                        | 0.42                   | 0.7                    | 0.52                   | 0.83                   |
| Total                          | 99.6                           | 99.64                       | 100                         | 99.9                        | 99.09                       | 99.59                  | 99.29                  | 99.16                  | 100.38                 |
| ASI                            | 1.073                          | 0.976                       | 0.944                       | 0.957                       | 0.979                       | 0.986                  | 0.836                  | 0.898                  | 0.891                  |
| Li                             |                                | 37.2                        | 33.5                        | 32.0                        |                             |                        |                        |                        |                        |
| Be                             |                                | 3.7                         | 2.5                         | 3.2                         |                             |                        |                        |                        |                        |
| Sc                             |                                | 11.8                        | 9.1                         | 12.5                        | 10.0                        | 8.2                    | 17.3                   | 16.4                   | 16.1                   |
| V                              |                                | 110.1                       | 75.8                        | 117.1                       | 82                          | 72                     | 162                    | 119                    | 134                    |
| Cr                             |                                | 74.3                        | 48.7                        | 79.0                        | 79                          | 61                     | 138                    | 140                    | 122                    |
| Co                             |                                | 193.5                       | 85.4                        | 85.7                        | 23                          | 33                     | 35                     | 32                     | 24                     |
| Ni                             |                                | 34.6                        | 35.6                        | 44.3                        | 39                          | 35                     | 83                     | 85                     | 97                     |
| Cu                             |                                | 37.8                        | 32.7                        | 49.6                        | 38                          | 38                     | 314                    | 352                    | 379                    |
| Zn                             |                                | 65.9                        | 49.2                        | 69.0                        | 45                          | 43                     | 89                     | 102                    | 82                     |
| Ga                             |                                | 18.0                        | 16.1                        | 18.8                        | 16.2                        | 15.6                   | 18.3                   | 21                     | 17.8                   |
| ASI                            |                                | 1.0                         | 1.5                         | 1.1                         |                             |                        |                        |                        |                        |
| Rb                             |                                | 262.2                       | 170.1                       | 189.3                       | 157                         | 159                    | 172                    | 241                    | 136                    |
| Sr                             |                                | 294.1                       | 295.5                       | 348.5                       | 223                         | 216                    | 208                    | 192                    | 174                    |
| Y                              |                                | 31.7                        | 21.0                        | 36.7                        | 23                          | 19.4                   | 26                     | 37                     | 28                     |

|    |        |       |       |      |      |      |      |      |
|----|--------|-------|-------|------|------|------|------|------|
| Zr | 177.1  | 138.9 | 201.9 | 158  | 130  | 187  | 182  | 167  |
| Nb | 20.6   | 14.8  | 20.2  | 15.3 | 14.1 | 19.4 | 29   | 17.4 |
| Mo | 3.9    | 1.1   | 3.5   | 0.8  | 0.8  | 1.7  | 0.5  | 0.5  |
| Cd | 0.1    | 0.1   | 0.1   |      |      |      |      |      |
| Sn | 2.8    | 2.7   | 3.5   | 10.2 | 10.2 | 20   | 23   | 18.1 |
| Sb | 0.3    | 0.6   | 0.2   |      |      |      |      |      |
| Cs | 13.9   | 10.3  | 11.2  | 7.8  | 8.7  | 13.1 | 19.9 | 11.5 |
| Ba | 1191.0 | 806.0 | 908.9 | 714  | 795  | 718  | 825  | 391  |
| La | 36.2   | 29.6  | 37.3  | 30   | 27   | 42   | 26   | 16.1 |
| Ce | 79.7   | 51.7  | 66.4  | 58   | 52   | 84   | 68   | 42   |
| Pr | 8.5    | 5.8   | 8.2   | 6.4  | 5.8  | 9.2  | 9.2  | 5.8  |
| Nd | 31.2   | 20.2  | 30.1  | 23   | 20   | 32   | 37   | 23   |
| Sm | 6.5    | 4.0   | 6.3   | 4.4  | 3.9  | 5.9  | 8.2  | 5.1  |
| Eu | 1.4    | 1.1   | 1.5   | 1.1  | 1.0  | 1.5  | 1.4  | 1.1  |
| Gd | 5.6    | 3.6   | 6.0   | 4.1  | 3.6  | 5.4  | 7.5  | 4.8  |
| Tb | 0.9    | 0.6   | 1.0   | 0.6  | 0.5  | 0.8  | 1.2  | 0.8  |
| Dy | 5.4    | 3.4   | 6.1   | 3.6  | 3.2  | 4.4  | 6.8  | 4.5  |
| Ho | 1.1    | 0.7   | 1.3   | 0.7  | 0.6  | 0.9  | 1.4  | 0.9  |
| Er | 3.1    | 2.0   | 3.5   | 2.1  | 1.9  | 2.5  | 4.1  | 2.7  |
| Tm | 0.4    | 0.3   | 0.5   | 0.3  | 0.3  | 0.4  | 0.6  | 0.4  |
| Yb | 2.8    | 1.9   | 3.1   | 2.1  | 1.8  | 2.3  | 4.0  | 2.7  |
| Lu | 0.4    | 0.3   | 0.5   | 0.3  | 0.3  | 0.3  | 0.6  | 0.4  |
| Hf | 4.8    | 3.7   | 5.2   | 4.0  | 3.4  | 4.1  | 4.1  | 4.1  |
| Ta | 3.5    | 2.6   | 2.4   | 1.4  | 1.2  | 1.3  | 2.3  | 1.1  |
| Tl | 1.4    | 0.9   | 1.1   |      |      |      |      |      |
| Pb | 24.2   | 23.2  | 19.2  | 20   | 22   | 19.0 | 17.6 | 16.3 |
| Th | 24.0   | 18.9  | 18.9  | 17.5 | 20   | 11.6 | 6.8  | 6.0  |
| U  | 6.8    | 5.1   | 4.4   | 2.6  | 2.1  | 1.4  | 3.0  | 2.1  |

| Pluton                         | Tanjil  | Tanjil  | Tanjil  | Tanjil  | Tanjil  | Tanjil  | Baw Baw      |
|--------------------------------|---------|---------|---------|---------|---------|---------|--------------|--------------|--------------|--------------|--------------|
| Rock type                      | Granite | Granite | Granite | Granite | Granite | Granite | Granodiorite | Granodiorite | Granodiorite | Granodiorite | Granodiorite |
| Sample No                      | TANJ1   | 301     | 302     | 303     | 313     | 314     | 304-1        | 305-2        | 306          | 307          | 308          |
| SiO <sub>2</sub>               | 70.29   | 72.25   | 72.34   | 69.99   | 72.14   | 71.56   | 67.29        | 66.99        | 66.47        | 67.16        | 67.16        |
| TiO <sub>2</sub>               | 0.4     | 0.27    | 0.29    | 0.49    | 0.32    | 0.33    | 0.72         | 0.71         | 0.74         | 0.7          | 0.7          |
| Al <sub>2</sub> O <sub>3</sub> | 14.4    | 13.64   | 13.89   | 14.38   | 13.83   | 14.23   | 14.67        | 14.67        | 14.75        | 14.63        | 14.63        |
| Fe <sub>2</sub> O <sub>3</sub> | 2.98    | 2.05    | 2.05    | 3.18    | 2.21    | 2.25    | 4.14         | 4.35         | 4.5          | 4.25         | 4.25         |
| MnO                            | 0.06    | 0.05    | 0.05    | 0.06    | 0.05    | 0.05    | 0.07         | 0.07         | 0.08         | 0.06         | 0.06         |
| MgO                            | 0.95    | 0.6     | 0.62    | 1.21    | 0.69    | 0.7     | 1.77         | 1.89         | 1.92         | 1.85         | 1.85         |
| CaO                            | 2.7     | 1.99    | 2.02    | 2.77    | 2.13    | 2.38    | 3.38         | 3.33         | 2.55         | 3.25         | 3.25         |
| Na <sub>2</sub> O              | 3.87    | 3.57    | 3.62    | 3.62    | 3.6     | 3.83    | 3.14         | 3.4          | 2.96         | 3.34         | 3.34         |
| K <sub>2</sub> O               | 3.07    | 3.71    | 3.62    | 3.24    | 3.56    | 3.36    | 3.67         | 3.21         | 3.34         | 3.27         | 3.27         |
| P <sub>2</sub> O <sub>5</sub>  | 0.12    | 0.06    | 0.06    | 0.11    | 0.07    | 0.07    | 0.14         | 0.14         | 0.14         | 0.14         | 0.14         |
| L.O.I.                         | 0.96    | 0.87    | 1.05    | 0.97    | 0.67    | 0.72    | 0.54         | 0.75         | 1.81         | 0.58         | 0.58         |
| Total                          | 99.8    | 99.09   | 99.61   | 100.01  | 99.27   | 99.49   | 99.56        | 99.54        | 99.25        | 99.25        | 99.25        |
| ASI                            | 0.985   | 1.009   | 1.024   | 0.991   | 1.012   | 0.996   | 0.959        | 0.969        | 1.123        | 0.978        | 0.978        |
| Li                             | 60.8    | 57      |         | 51      |         |         | 42           |              | 32           |              |              |
| Be                             | 2.9     |         |         |         |         |         |              |              |              |              |              |
| Sc                             | 6.2     | 3.7     |         | 6.7     |         |         | 9.2          |              | 7.8          |              |              |
| V                              | 37.0    | 26      |         | 49      |         |         | 70           |              | 59           |              |              |
| Cr                             | 11.0    | 27      |         | 31      |         |         | 105          |              | 62           |              |              |
| Co                             | 92.3    | 32      |         | 46      |         |         | 21           |              | 23           |              |              |
| Ni                             | 7.3     | 5.1     |         | 15.8    |         |         | 23           |              | 23           |              |              |
| Cu                             | 13.6    | 110     |         | 48      |         |         | 27           |              | 30           |              |              |
| Zn                             | 48.5    | 37      |         | 56      |         |         | 58           |              | 52           |              |              |
| Ga                             | 16.3    | 14.2    |         | 15.3    |         |         | 16.0         |              | 13.6         |              |              |
| ASI                            | 1.1     |         |         |         |         |         |              |              |              |              |              |
| Rb                             | 158.2   | 172     |         | 135     |         |         | 137          |              | 109          |              | 109          |
| Sr                             | 229.9   | 180     |         | 204     |         |         | 243          |              | 162          |              | 162          |

|    |       |      |      |      |      |    |
|----|-------|------|------|------|------|----|
| Y  | 28.7  | 25   | 33   | 29   | 23   |    |
| Zr | 148.8 | 134  | 177  | 212  | 147  | 11 |
| Nb | 15.2  | 12.5 | 14.8 | 13.5 | 10.0 |    |
| Mo | 1.4   | 0.3  | 1.2  | 1.6  | 0.3  |    |
| Cd | 0.1   |      |      |      |      |    |
| Sn | 4.0   | 4.4  | 5.0  | 3.5  | 3.0  |    |
| Sb | 0.2   |      |      |      |      |    |
| Cs | 8.0   | 10.6 | 8.5  | 8.1  | 4.8  |    |
| Ba | 718.6 | 747  | 888  | 1541 | 1054 | 11 |
| La | 34.2  | 28   | 35   | 28   | 18.9 |    |
| Ce | 64.6  | 51   | 65   | 53   | 37   |    |
| Pr | 6.9   | 5.2  | 6.9  | 6.0  | 4.5  |    |
| Nd | 23.8  | 18   | 25   | 23   | 17.7 |    |
| Sm | 4.8   | 4.0  | 5.5  | 5.4  | 4.6  |    |
| Eu | 0.9   | 0.7  | 1.0  | 1.5  | 1.2  |    |
| Gd | 4.5   | 3.6  | 5.1  | 5.0  | 4.1  |    |
| Tb | 0.7   | 0.7  | 0.9  | 0.9  | 0.7  |    |
| Dy | 4.5   | 4.1  | 5.6  | 5.2  | 4.4  |    |
| Ho | 1.0   | 0.8  | 1.1  | 1.0  | 0.9  |    |
| Er | 2.7   | 2.5  | 3.3  | 2.9  | 2.5  |    |
| Tm | 0.4   | 0.4  | 0.5  | 0.4  | 0.3  |    |
| Yb | 2.7   | 2.4  | 3.2  | 2.6  | 2.3  |    |
| Lu | 0.4   | 0.4  | 0.5  | 0.4  | 0.3  |    |
| Hf | 4.0   | 4.1  | 5.2  | 5.7  | 4.0  |    |
| Ta | 2.7   | 1.5  | 1.8  | 1.2  | 0.9  |    |
| Tl | 0.8   |      |      |      |      |    |
| Pb | 17.4  | 21.1 | 17.5 | 20.2 | 15.0 |    |
| Th | 17.8  | 14.6 | 15.8 | 11.3 | 7.5  |    |
| U  | 3.7   | 5.7  | 4.6  | 3.6  | 2.0  |    |

| Pluton                         | Baw Baw      | Baw Baw      | Baw Baw      | Baw Baw | Baw Baw | Toorong      | Toorong      | Toorong      | Toorong      |
|--------------------------------|--------------|--------------|--------------|---------|---------|--------------|--------------|--------------|--------------|
| Rock type                      | Granodiorite | Granodiorite | Granodiorite | Enclave | Enclave | Granodiorite | Granodiorite | Granodiorite | Granodiorite |
| Sample No                      | BAW1         | BAW2         | 311          | 304-1-1 | 305-1   | 402          | 408          | TOO1         | 315          |
| SiO <sub>2</sub>               | 67.65        | 66.92        | 67.74        | 55.45   | 60.58   | 66.23        | 64.38        | 64.41        | 66.14        |
| TiO <sub>2</sub>               | 0.69         | 0.69         | 0.72         | 1.04    | 0.93    | 0.78         | 0.85         | 0.85         | 0.62         |
| Al <sub>2</sub> O <sub>3</sub> | 14.71        | 14.98        | 14.74        | 13.58   | 14.57   | 15.07        | 15.72        | 15.36        | 16.39        |
| Fe <sub>2</sub> O <sub>3</sub> | 4.17         | 4.28         | 4.18         | 9.07    | 7.19    | 4.61         | 5.13         | 5.18         | 3.58         |
| MnO                            | 0.06         | 0.06         | 0.06         | 0.23    | 0.14    | 0.06         | 0.08         | 0.08         | 0.06         |
| MgO                            | 1.84         | 1.86         | 1.72         | 5.24    | 3.9     | 1.99         | 2.29         | 2.49         | 1.37         |
| CaO                            | 3.19         | 3.34         | 3.31         | 6.5     | 5.23    | 3.44         | 4.43         | 4.16         | 4.11         |
| Na <sub>2</sub> O              | 3.22         | 3.33         | 3.31         | 2.64    | 3.69    | 3.47         | 3.7          | 3.36         | 4.03         |
| K <sub>2</sub> O               | 3.41         | 3.29         | 3.36         | 4.08    | 2.08    | 2.97         | 2.37         | 2.63         | 2.47         |
| P <sub>2</sub> O <sub>5</sub>  | 0.18         | 0.19         | 0.14         | 0.18    | 0.21    | 0.16         | 0.17         | 0.2          | 0.13         |
| L.O.I.                         | 0.7          | 0.68         | 0.57         | 0.94    | 0.91    | 0.54         | 0.54         | 0.87         | 0.48         |
| Total                          | 99.86        | 99.65        | 99.85        | 98.98   | 99.43   | 99.32        | 99.68        | 99.63        | 99.39        |
| ASI                            | 0.993        | 0.990        | 0.975        | 0.659   | 0.816   | 0.992        | 0.940        | 0.962        | 0.976        |
| Li                             | 42.0         | 40.2         | 46           | 51      | 39      | 34.8         | 37.4         | 34.8         | 24           |
| Be                             | 2.6          | 2.8          |              |         |         | 2.5          | 2.4          | 2.4          |              |
| Sc                             | 10.6         | 10.9         | 9.3          | 24      | 25      | 10.9         | 12.7         | 13.2         | 4.9          |
| V                              | 64.5         | 62.2         | 73           | 160     | 110     | 67.2         | 82.5         | 89.6         | 61           |
| Cr                             | 52.2         | 53.2         | 94           | 305     | 164     | 56.7         | 73.7         | 76.3         | 60           |
| Co                             | 81.8         | 92.6         | 29           | 32      | 27      | 30.9         | 19.6         | 94.1         | 19           |
| Ni                             | 23.8         | 24.7         | 25           | 41      | 58      | 25.4         | 22.2         | 35.1         | 13.3         |
| Cu                             | 19.4         | 23.7         | 30           | 21      | 17.1    | 19.9         | 34.1         | 38.6         | 25           |
| Zn                             | 64.6         | 62.7         | 64           | 123     | 83      | 62.8         | 65.6         | 77.0         | 41           |
| Ga                             | 18.3         | 18.5         | 16.7         | 16.1    | 15.1    | 18.5         | 18.7         | 19.6         | 15.7         |
| ASI                            | 22.4         | 11.7         |              |         |         | 1.3          | 1.4          | 1.2          |              |
| Rb                             | 162.0        | 153.6        | 136          | 164     | 96      | 144.2        | 107.9        | 127.9        | 37           |
| Sr                             | 212.7        | 226.0        | 232          | 183     | 159     | 239.0        | 300.1        | 274.0        | 209          |

|    |        |        |      |      |      |        |        |        |      |
|----|--------|--------|------|------|------|--------|--------|--------|------|
| Y  | 38.1   | 39.1   | 35   | 67   | 61   | 35.4   | 32.3   | 31.1   | 20   |
| Zr | 199.7  | 215.5  | 262  | 143  | 155  | 211.7  | 216.6  | 222.4  | 130  |
| Nb | 14.5   | 15.0   | 14.3 | 16.3 | 14.4 | 15.1   | 13.2   | 14.7   | 10.8 |
| Mo | 2.1    | 2.3    | 1.7  | 1.6  | 0.9  | 1.5    | 2.0    | 3.0    | 1.7  |
| Cd | 0.1    | 0.1    |      |      |      | 0.1    | 0.1    | 0.1    |      |
| Sn | 4.3    | 5.1    | 3.8  | 6.5  | 4.2  | 3.3    | 3.4    | 2.9    | 2.0  |
| Sb | 0.4    | 0.3    |      |      |      | 0.2    | 0.5    | 0.3    |      |
| Cs | 7.8    | 9.4    | 6.9  | 7.2  | 7.2  | 6.8    | 7.0    | 6.2    | 3.2  |
| Ba | 1162.5 | 1077.9 | 1089 | 1504 | 644  | 1177.8 | 1015.6 | 1215.5 | 878  |
| La | 29.0   | 38.2   | 39   | 14.3 | 18.6 | 40.3   | 26.6   | 27.4   | 14.5 |
| Ce | 59.6   | 70.5   | 75   | 37   | 48   | 77.5   | 55.1   | 55.8   | 32   |
| Pr | 7.1    | 8.9    | 8.3  | 5.8  | 6.9  | 9.4    | 6.6    | 6.6    | 3.4  |
| Nd | 27.3   | 32.8   | 30   |      | 31   | 34.0   | 26.1   | 25.7   | 13.1 |
| Sm | 6.4    | 7.0    | 6.7  | 10.0 | 9.1  | 6.9    | 5.9    | 5.9    | 3.3  |
| Eu | 1.3    | 1.4    | 1.4  | 1.3  | 1.0  | 1.5    | 1.6    | 1.6    | 1.2  |
| Gd | 6.1    | 6.5    | 6.0  | 10.2 | 8.8  | 6.2    | 5.6    | 5.5    | 3.2  |
| Tb | 1.0    | 1.1    | 1.0  | 2.0  | 1.7  | 1.0    | 0.9    | 0.9    | 0.6  |
| Dy | 6.3    | 6.5    | 6.2  | 12.5 | 10.6 | 6.0    | 5.5    | 5.3    | 3.6  |
| Ho | 1.4    | 1.4    | 1.2  | 2.5  | 2.1  | 1.3    | 1.2    | 1.1    | 0.7  |
| Er | 3.7    | 3.8    | 3.5  | 6.9  | 6.2  | 3.4    | 3.2    | 3.1    | 2.2  |
| Tm | 0.5    | 0.5    | 0.5  | 0.9  | 0.9  | 0.5    | 0.4    | 0.4    | 0.3  |
| Yb | 3.3    | 3.5    | 3.2  | 6.1  | 5.9  | 3.0    | 3.0    | 2.7    | 2.1  |
| Lu | 0.5    | 0.5    | 0.5  | 0.9  | 0.9  | 0.4    | 0.4    | 0.4    | 0.3  |
| Hf | 5.1    | 5.4    | 7.0  | 3.8  | 4.5  | 5.2    | 5.4    | 5.3    | 3.6  |
| Ta | 2.3    | 2.6    | 1.2  | 1.0  | 1.3  | 1.2    | 1.1    | 2.3    | 1.1  |
| Tl | 1.0    | 0.9    |      |      |      | 0.9    | 0.8    | 0.8    |      |
| Pb | 18.4   | 18.5   | 18.9 | 19.0 | 11.8 | 16.9   | 15.9   | 15.2   | 11.8 |
| Th | 13.8   | 13.6   | 13.5 | 5.3  | 12.4 | 12.7   | 62.3   | 8.6    | 5.3  |
| U  | 3.5    | 3.7    | 3.8  | 2.2  | 2.6  | 2.9    | 11.3   | 2.4    | 2.7  |

| Pluton                         | Toorongo     | Toorongo     | Tynong  | Tynong  | Tynong  | Tynong  | Tynong  | Tynong  | Toorongo     |
|--------------------------------|--------------|--------------|---------|---------|---------|---------|---------|---------|--------------|
| Rock type                      | Granodiorite | Granodiorite | Granite | Granite | Granite | Granite | Granite | Granite | Granodiorite |
| Sample No                      | 403          | 406          | 203     | 2802-2  | 2805    | 2803-7  | 2803-8  | 2803-5  | 315          |
| SiO <sub>2</sub>               | 64.18        | 63.32        | 67.85   | 65.98   | 69.75   | 70.88   | 67.99   | 63.36   | 66.14        |
| TiO <sub>2</sub>               | 0.85         | 0.91         | 0.55    | 0.54    | 0.46    | 0.34    | 0.48    | 0.38    | 0.62         |
| Al <sub>2</sub> O <sub>3</sub> | 15.95        | 15.82        | 15.53   | 14.5    | 14.65   | 14.26   | 15.18   | 18.32   | 16.39        |
| Fe <sub>2</sub> O <sub>3</sub> | 5.16         | 5.37         | 3.41    | 4.31    | 2.78    | 1.99    | 3.12    | 2.5     | 3.58         |
| MnO                            | 0.08         | 0.09         | 0.05    | 0.07    | 0.04    | 0.03    | 0.04    | 0.03    | 0.06         |
| MgO                            | 2.31         | 2.57         | 1.26    | 2.43    | 0.93    | 0.77    | 1.13    | 1.02    | 1.37         |
| CaO                            | 4.54         | 4.57         | 3.16    | 4.18    | 2.68    | 2.04    | 3.36    | 3.53    | 4.11         |
| Na <sub>2</sub> O              | 3.8          | 3.57         | 3.94    | 3.59    | 3.71    | 3.37    | 3.6     | 4.83    | 4.03         |
| K <sub>2</sub> O               | 2.32         | 2.33         | 3.22    | 1.94    | 3.46    | 4.42    | 2.66    | 3.22    | 2.47         |
| P <sub>2</sub> O <sub>5</sub>  | 0.17         | 0.19         | 0.13    | 0.14    | 0.1     | 0.21    | 0.22    | 0.2     | 0.13         |
| L.O.I.                         | 0.55         | 0.64         | 0.64    | 1.62    | 0.39    | 1.09    | 1.23    | 1.67    | 0.48         |
| Total                          | 99.94        | 99.4         | 99.74   | 99.33   | 98.95   | 99.4    | 99.02   | 99.07   | 99.39        |
| ASI                            | 0.936        | 0.946        | 0.987   | 0.928   | 0.994   | 1.015   | 1.017   | 1.025   | 0.976        |
| Li                             | 32           | 45           |         | 50      |         | 49      |         | 41      | 24           |
| Be                             |              |              |         | 2.3     |         | 1.7     |         | 3.0     |              |
| Sc                             | 11.4         | 11.9         |         | 12.2    |         | 6.9     |         | 7.5     | 4.9          |
| V                              | 91           | 106          |         | 80      |         | 29      |         | 42      | 61           |
| Cr                             | 66           | 116          |         | 205     |         | 75      |         | 73      | 60           |
| Co                             | 35           | 20           |         | 16.5    |         | 3.6     |         | 7.2     | 19           |
| Ni                             | 30           | 35           |         | 108     |         | 7.6     |         | 11.1    | 13.3         |
| Cu                             | 50           | 76           |         | 648     |         | 5.8     |         | 5.4     | 25           |
| Zn                             | 67           | 76           |         | 71      |         | 17.6    |         | 25.4    | 41           |
| Ga                             | 16.5         | 18.1         |         | 16.5    |         | 15.9    |         | 21.1    | 15.7         |
| ASI                            |              |              |         |         |         |         |         |         |              |
| Rb                             | 85           | 98           |         | 89      |         | 108     |         | 143     | 37           |
| Sr                             | 287          | 296          |         | 235     |         | 157     |         | 296     | 209          |
| Y                              | 32           | 33           |         | 26      |         | 22      |         | 27      | 20           |

|    |      |      |      |      |       |      |
|----|------|------|------|------|-------|------|
| Zr | 206  | 218  | 293  | 193  | 135   | 130  |
| Nb | 12.5 | 14.5 | 20.8 | 12.4 | 15.4  | 10.8 |
| Mo | 1.3  | 1.8  | 0.8  | 4.2  | 137.7 | 1.7  |
| Cd |      |      |      |      |       |      |
| Sn | 1.9  | 3.0  | 8.0  | 3.1  | 3.6   | 2.0  |
| Sb |      |      |      |      |       |      |
| Cs | 4.0  | 5.4  | 7.7  | 12.5 | 9.5   | 3.2  |
| Ba | 959  | 1059 | 598  | 973  | 477   | 878  |
| La | 35   | 37   | 38   | 24   | 14.4  | 14.5 |
| Ce | 67   | 68   | 73   | 58   | 29    | 32   |
| Pr | 7.5  | 8.0  | 7.6  | 5.9  | 3.4   | 3.4  |
| Nd | 28   | 29   | 24   | 19.1 | 11.7  | 13.1 |
| Sm | 6.4  | 6.4  | 4.5  | 4.0  | 3.0   | 3.3  |
| Eu | 1.5  | 1.6  | 1.2  | 0.9  | 1.3   | 1.2  |
| Gd | 5.9  | 5.8  | 4.2  | 3.6  | 3.1   | 3.2  |
| Tb | 1.0  | 1.0  | 0.7  | 0.7  | 0.7   | 0.6  |
| Dy | 6.0  | 5.9  | 4.1  | 3.9  | 4.1   | 3.6  |
| Ho | 1.2  | 1.1  | 0.9  | 0.9  | 0.9   | 0.7  |
| Er | 3.3  | 3.3  | 2.5  | 2.3  | 2.6   | 2.2  |
| Tm | 0.4  | 0.5  | 0.4  | 0.4  | 0.4   | 0.3  |
| Yb | 2.8  | 3.0  | 2.5  | 2.2  | 2.8   | 2.1  |
| Lu | 0.4  | 0.5  | 0.4  | 0.3  | 0.4   | 0.3  |
| Hf | 5.3  | 5.7  | 7.7  | 5.4  | 4.1   | 3.6  |
| Ta | 0.9  | 1.4  | 1.6  | 1.1  | 1.9   | 1.1  |
| Tl |      |      |      |      |       |      |
| Pb | 11.6 | 13.7 | 12.3 | 30   | 26    | 11.8 |
| Th | 8.9  | 9.4  | 14.4 | 16.2 | 4.9   | 5.3  |
| U  | 2.1  | 3.2  | 4.0  | 3.0  | 6.6   | 2.7  |

---

| Pluton                         | Tynong              | Tynong              | Tynong       | Tynong       | Tynong       | Tynong  | Tynong  | Tynong       | Tynong       |
|--------------------------------|---------------------|---------------------|--------------|--------------|--------------|---------|---------|--------------|--------------|
| Rock type                      | Porphyritic granite | Porphyritic granite | Aplitic dyke | Granodiorite | Granodiorite | Granite | Granite | Granodiorite | Granodiorite |
| Sample No                      | 2803-6              | 120204              | 120207       | 120205       | 120206       | 120202  | 2803-1  | TYN1A        | TYN1B        |
| SiO <sub>2</sub>               | 65.2                | 66.49               | 76.61        | 75.41        | 76.02        | 72.18   | 71.12   | 69.38        | 72.19        |
| TiO <sub>2</sub>               | 0.37                | 0.52                | 0.1          | 0.22         | 0.18         | 0.49    | 0.35    | 0.45         | 0.37         |
| Al <sub>2</sub> O <sub>3</sub> | 17.75               | 15.73               | 12.18        | 12.92        | 12.32        | 12.73   | 14.31   | 15.01        | 13.34        |
| Fe <sub>2</sub> O <sub>3</sub> | 2.27                | 3.54                | 0.94         | 0.96         | 1.2          | 3.43    | 2.33    | 2.95         | 2.65         |
| MnO                            | 0.04                | 0.06                | 0.04         | 0.01         | 0.02         | 0.07    | 0.04    | 0.05         | 0.05         |
| MgO                            | 0.9                 | 1.29                | 0.12         | 0.25         | 0.59         | 1.23    | 0.73    | 0.94         | 0.99         |
| CaO                            | 3.48                | 3.34                | 0.47         | 0.74         | 0.59         | 1.67    | 2.55    | 2.58         | 2.2          |
| Na <sub>2</sub> O              | 4.76                | 4.11                | 3.07         | 3.32         | 2.87         | 3.43    | 3.63    | 3.89         | 3.56         |
| K <sub>2</sub> O               | 3.28                | 3.04                | 5.4          | 4.5          | 5.69         | 2.8     | 3.33    | 3.77         | 3.7          |
| P <sub>2</sub> O <sub>5</sub>  | 0.19                | 0.11                | 0.01         | 0.01         | 0.03         | 0.12    | 0.09    | 0.11         | 0.1          |
| L.O.I.                         | 1.42                | 0.98                | 0.47         | 0.69         | 0.34         | 0.88    | 0.71    | 0.74         | 0.65         |
| Total                          | 99.66               | 99.23               | 99.42        | 99.03        | 99.88        | 99.02   | 99.2    | 99.88        | 99.81        |
| ASI                            | 1.001               | 0.974               | 1.035        | 1.105        | 1.029        | 1.086   | 1.006   | 0.988        | 0.961        |
| Li                             | 33                  |                     |              | 52.8         | 49.0         | 118.5   | 41.4    | 42.4         | 34.9         |
| Be                             | 2.8                 |                     |              | 4.1          | 2.5          | 3.2     | 2.4     | 2.9          | 2.3          |
| Sc                             | 4.9                 |                     |              | 3.7          | 3.3          | 7.1     | 4.0     | 6.6          | 5.6          |
| V                              | 24                  |                     |              | 11.6         | 7.9          | 48.4    | 28.0    | 40.0         | 34.5         |
| Cr                             | 82                  |                     |              | 76.2         | 85.6         | 111.9   | 64.4    | 16.6         | 18.0         |
| Co                             | 5.6                 |                     |              | 3.2          | 1.4          | 7.4     | 4.1     | 84.7         | 98.2         |
| Ni                             | 9.0                 |                     |              | 3.7          | 2.4          | 13.5    | 6.2     | 9.9          | 9.6          |
| Cu                             | 4.7                 |                     |              | 27.4         | 0.9          | 96.2    | 17.9    | 69.1         | 32.7         |
| Zn                             | 21.2                |                     |              | 31.7         | 24.9         | 52.4    | 34.7    | 52.6         | 42.8         |
| Ga                             | 18.5                |                     |              | 15.7         | 14.5         | 15.6    | 15.2    | 18.2         | 14.3         |
| ASI                            |                     |                     |              | 3.8          | 0.1          | 3.7     | 0.9     | 1.3          | 0.5          |
| Rb                             | 79                  |                     |              | 304.4        | 252.1        | 191.8   | 171.0   | 186.8        | 165.8        |
| Sr                             | 252                 |                     |              | 39.8         | 22.6         | 113.5   | 194.5   | 189.3        | 132.1        |

|    |      |       |       |       |       |        |       |
|----|------|-------|-------|-------|-------|--------|-------|
| Y  | 17.8 | 56.2  | 47.0  | 39.9  | 28.1  | 42.8   | 34.3  |
| Zr | 105  | 137.5 | 104.9 | 202.1 | 113.8 | 211.6  | 162.1 |
| Nb | 8.5  | 16.9  | 15.4  | 19.0  | 12.6  | 16.8   | 14.1  |
| Mo | 3.0  | 0.9   | 0.6   | 1.2   | 0.5   | 3.1    | 1.9   |
| Cd |      | 0.3   | 0.0   | 0.1   | 0.1   | 0.1    | 0.1   |
| Sn | 2.8  | 9.5   | 3.6   | 4.7   | 4.1   | 4.5    | 4.8   |
| Sb |      | 0.9   | 0.3   | 2.5   | 0.4   | 0.4    | 0.3   |
| Cs | 7.1  | 13.5  | 9.7   | 10.7  | 11.4  | 6.9    | 9.3   |
| Ba | 465  | 405.3 | 266.0 | 492.1 | 772.4 | 1290.9 | 720.9 |
| La | 8.9  | 20.4  | 36.6  | 40.1  | 38.5  | 53.0   | 41.2  |
| Ce | 18.0 | 42.3  | 79.2  | 72.0  | 71.6  | 96.5   | 72.1  |
| Pr | 2.1  | 4.8   | 9.4   | 8.4   | 7.8   | 10.5   | 8.4   |
| Nd | 7.6  | 17.0  | 34.4  | 29.3  | 26.0  | 35.7   | 28.3  |
| Sm | 2.0  | 4.3   | 8.6   | 6.2   | 5.1   | 7.2    | 5.7   |
| Eu | 1.1  | 0.3   | 0.2   | 0.6   | 0.9   | 1.1    | 0.8   |
| Gd | 2.1  | 4.6   | 7.0   | 5.7   | 4.4   | 6.6    | 5.3   |
| Tb | 0.5  | 1.0   | 1.2   | 1.0   | 0.7   | 1.1    | 0.9   |
| Dy | 2.9  | 7.1   | 7.3   | 6.2   | 4.3   | 6.8    | 5.6   |
| Ho | 0.7  | 1.7   | 1.6   | 1.4   | 0.9   | 1.5    | 1.2   |
| Er | 1.8  | 5.3   | 4.6   | 3.8   | 2.6   | 4.2    | 3.5   |
| Tm | 0.3  | 0.8   | 0.7   | 0.6   | 0.4   | 0.6    | 0.5   |
| Yb | 2.0  | 5.8   | 4.8   | 3.8   | 2.6   | 4.0    | 3.5   |
| Lu | 0.3  | 0.9   | 0.7   | 0.6   | 0.4   | 0.6    | 0.5   |
| Hf | 3.1  | 4.7   | 3.8   | 5.3   | 3.1   | 5.7    | 4.6   |
| Ta | 0.9  | 2.6   | 1.6   | 2.0   | 1.4   | 2.8    | 2.7   |
| Tl |      | 1.8   | 1.6   | 1.1   | 1.0   | 1.1    | 1.1   |
| Pb | 28   | 33.3  | 30.1  | 18.0  | 19.9  | 20.1   | 19.5  |
| Th | 3.1  | 44.9  | 41.8  | 26.0  | 13.9  | 18.3   | 21.8  |
| U  | 4.8  | 15.5  | 11.9  | 6.9   | 5.1   | 6.3    | 5.6   |

| Pluton                         | Tynong       | Tynong       | Tynong       | Tynong       | Tynong       | Tynong  | Tynong  | Tynong  | Tynong  |
|--------------------------------|--------------|--------------|--------------|--------------|--------------|---------|---------|---------|---------|
| Rock type                      | Granodiorite | Granodiorite | Granodiorite | Granodiorite | Granodiorite | Enclave | Diorite | Diorite | Enclave |
| Sample No                      | TYN3         | TYN4         | TYN5         | TYN6         | TYN7         | TYN1C-B | 2803-10 | 2810    | 2803-4  |
| SiO <sub>2</sub>               | 72.55        | 73.94        | 77.38        | 70.26        | 67.35        | 57.49   | 55.29   | 57.46   | 58.34   |
| TiO <sub>2</sub>               | 0.39         | 0.11         | 0.27         | 0.43         | 0.61         | 1.21    | 1.33    | 1.25    | 1.18    |
| Al <sub>2</sub> O <sub>3</sub> | 13.26        | 14.39        | 11.45        | 14.47        | 15.5         | 16.48   | 16.62   | 16.43   | 16.34   |
| Fe <sub>2</sub> O <sub>3</sub> | 2.58         | 0.91         | 1.68         | 2.57         | 3.78         | 7.85    | 8.17    | 7.73    | 7.44    |
| MnO                            | 0.04         | 0.02         | 0.02         | 0.04         | 0.05         | 0.13    | 0.13    | 0.13    | 0.13    |
| MgO                            | 0.71         | 0.17         | 0.43         | 0.72         | 1.19         | 3.59    | 3.33    | 3.31    | 2.94    |
| CaO                            | 2.07         | 2.07         | 1.13         | 2.11         | 3.4          | 6.39    | 6.65    | 6.39    | 6.33    |
| Na <sub>2</sub> O              | 3.27         | 3.27         | 2.55         | 3.69         | 3.82         | 3.13    | 3.22    | 3.29    | 3.24    |
| K <sub>2</sub> O               | 3.8          | 4.77         | 4.56         | 3.6          | 3.18         | 1.88    | 1.76    | 1.57    | 1.54    |
| P <sub>2</sub> O <sub>5</sub>  | 0.11         | 0.03         | 0.08         | 0.12         | 0.16         | 0.43    | 0.46    | 0.41    | 0.41    |
| L.O.I.                         | 1            | 0.38         | 0.36         | 1.51         | 0.68         | 1.17    | 2.48    | 1.15    | 1.38    |
| Total                          | 99.78        | 100.07       | 99.93        | 99.63        | 99.73        | 99.77   | 99.43   | 99.11   | 99.28   |
| ASI                            | 0.999        | 1.004        | 1.022        | 1.047        | 0.973        | 0.875   | 0.860   | 0.876   | 0.882   |
| Li                             | 55.5         | 46.9         | 35.0         | 54.6         | 40.2         | 58.5    | 71      | 64      | 41      |
| Be                             | 2.9          | 3.4          | 2.1          | 2.9          | 2.8          | 2.0     | 1.7     | 2.3     | 1.9     |
| Sc                             | 5.9          | 2.6          | 4.6          | 6.6          | 8.9          | 16.7    | 17.4    | 21      | 16.8    |
| V                              | 29.7         | 6.6          | 18.3         | 29.5         | 57.0         | 176.5   | 138     | 178     | 130     |
| Cr                             | 12.6         | 3.0          | 8.8          | 12.6         | 16.9         | 25.2    | 64      | 83      | 73      |
| Co                             | 70.9         | 91.5         | 137.3        | 116.7        | 93.1         | 84.9    | 22      | 26      | 19.6    |
| Ni                             | 6.6          | 1.7          | 4.7          | 8.3          | 9.6          | 18.5    | 20      | 24      | 19.9    |
| Cu                             | 10.9         | 4.0          | 5.0          | 77.0         | 15.7         | 81.0    | 83      | 83      | 74      |
| Zn                             | 38.2         | 20.9         | 31.5         | 47.2         | 55.4         | 95.1    | 90      | 110     | 90      |
| Ga                             | 16.2         | 16.1         | 13.7         | 17.4         | 19.3         | 18.1    | 16.0    | 21.0    | 17.0    |
| ASI                            | 0.0          | 0.6          | 0.4          | 63.8         | 1.3          | 0.4     |         |         |         |
| Rb                             | 183.0        | 210.9        | 202.2        | 182.4        | 140.6        | 80.1    | 106     | 73      | 47      |
| Sr                             | 148.1        | 126.8        | 94.8         | 144.3        | 227.0        | 395.1   | 380     | 448     | 393     |
| Y                              | 41.5         | 32.8         | 37.1         | 57.0         | 36.9         | 34.1    | 26      | 34      | 29      |

|    |       |       |       |       |        |       |      |      |      |
|----|-------|-------|-------|-------|--------|-------|------|------|------|
| Zr | 195.1 | 66.1  | 100.7 | 171.6 | 217.0  | 214.2 | 236  | 200  | 221  |
| Nb | 13.1  | 7.1   | 8.5   | 15.4  | 15.1   | 23.8  | 21   | 30   | 26   |
| Mo | 1.8   | 1.3   | 2.1   | 2.3   | 2.4    | 1.9   | 5.3  | 1.4  | 1.5  |
| Cd | 0.1   | 0.1   | 0.0   | 0.2   | 0.1    | 0.1   |      |      |      |
| Sn | 3.8   | 3.2   | 5.2   | 7.8   | 3.8    | 3.4   | 5.0  | 1.9  | 1.6  |
| Sb | 0.1   | 0.4   | 0.1   | 0.4   | 0.4    | 0.3   |      |      |      |
| Cs | 13.4  | 10.3  | 7.7   | 8.3   | 6.5    | 10.2  | 11.4 | 9.5  | 4.5  |
| Ba | 748.7 | 957.1 | 918.2 | 439.6 | 1243.0 | 517.3 | 588  | 641  | 533  |
| La | 41.2  | 22.7  | 33.2  | 63.5  | 54.5   | 34.8  | 30   | 43   | 36   |
| Ce | 74.6  | 45.2  | 68.4  | 106.7 | 98.8   | 70.7  | 62   | 88   | 76   |
| Pr | 9.1   | 5.1   | 7.7   | 12.8  | 11.0   | 7.9   | 7.0  | 9.6  | 8.2  |
| Nd | 31.8  | 18.1  | 27.2  | 44.9  | 38.1   | 28.7  | 23   | 32   | 28   |
| Sm | 6.7   | 4.3   | 5.9   | 9.3   | 7.4    | 5.9   | 4.9  | 6.4  | 5.5  |
| Eu | 0.9   | 0.8   | 0.7   | 1.1   | 1.5    | 1.5   | 1.5  | 2.1  | 1.8  |
| Gd | 6.2   | 4.2   | 5.6   | 8.9   | 6.7    | 5.6   | 4.5  | 6.0  | 5.2  |
| Tb | 1.1   | 0.8   | 1.0   | 1.5   | 1.1    | 0.9   | 0.8  | 1.0  | 0.9  |
| Dy | 6.8   | 5.2   | 6.0   | 9.1   | 6.4    | 5.7   | 4.4  | 5.7  | 4.9  |
| Ho | 1.5   | 1.2   | 1.3   | 2.0   | 1.4    | 1.3   | 1.0  | 1.2  | 1.1  |
| Er | 4.1   | 3.3   | 3.6   | 5.3   | 3.7    | 3.4   | 2.6  | 3.3  | 2.8  |
| Tm | 0.6   | 0.5   | 0.5   | 0.7   | 0.5    | 0.5   | 0.4  | 0.5  | 0.4  |
| Yb | 3.8   | 3.3   | 3.1   | 4.6   | 3.3    | 3.2   | 2.5  | 3.1  | 2.7  |
| Lu | 0.6   | 0.5   | 0.4   | 0.7   | 0.5    | 0.5   | 0.4  | 0.5  | 0.4  |
| Hf | 5.2   | 2.2   | 2.8   | 4.6   | 5.6    | 5.1   | 5.5  | 5.3  | 5.2  |
| Ta | 2.2   | 1.9   | 1.8   | 2.6   | 2.5    | 2.4   | 1.1  | 1.7  | 1.4  |
| Tl | 1.1   | 1.3   | 1.2   | 1.7   | 0.8    | 0.8   |      |      |      |
| Pb | 18.3  | 28.7  | 23.5  | 23.7  | 16.0   | 8.2   | 10.9 | 12.9 | 10.3 |
| Th | 19.7  | 14.5  | 17.3  | 23.5  | 16.8   | 5.2   | 4.6  | 8.2  | 7.5  |
| U  | 4.1   | 4.5   | 4.0   | 5.3   | 2.6    | 1.5   | 1.9  | 2.3  | 2.7  |

| Pluton                         | Tynong  | Tynong                     | Tynong                     |
|--------------------------------|---------|----------------------------|----------------------------|
| Rock type                      | Diorite | Hybrid diorite<br>(ocelli) | Hybrid diorite<br>(ocelli) |
| Sample No                      | 2803-2  | 2801                       | 2802-3                     |
| SiO <sub>2</sub>               | 57.81   | 61.38                      | 58.52                      |
| TiO <sub>2</sub>               | 1.24    | 0.87                       | 0.65                       |
| Al <sub>2</sub> O <sub>3</sub> | 16.45   | 14.27                      | 14.36                      |
| Fe <sub>2</sub> O <sub>3</sub> | 7.59    | 6.28                       | 6.33                       |
| MnO                            | 0.13    | 0.12                       | 0.12                       |
| MgO                            | 3.03    | 4.02                       | 4.87                       |
| CaO                            | 6.11    | 5.21                       | 6.34                       |
| Na <sub>2</sub> O              | 3.25    | 3.28                       | 2.84                       |
| K <sub>2</sub> O               | 1.83    | 2.48                       | 1.75                       |
| P <sub>2</sub> O <sub>5</sub>  | 0.42    | 0.26                       | 0.19                       |
| L.O.I.                         | 1.15    | 1.7                        | 3.01                       |
| Total                          | 99.02   | 99.9                       | 98.99                      |
| ASI                            | 0.891   | 0.812                      | 0.793                      |
| Li                             | 52      | 49                         | 74                         |
| Be                             | 2.0     | 1.8                        | 1.7                        |
| Sc                             | 17.8    | 16.9                       | 20                         |
| V                              | 136     | 130                        | 127                        |
| Cr                             | 73      | 244                        | 341                        |
| Co                             | 21      | 25                         | 33                         |
| Ni                             | 20      | 163                        | 248                        |
| Cu                             | 124     | 116                        | 112                        |
| Zn                             | 96      | 65                         | 85                         |
| Ga                             | 17.9    | 15.1                       | 15.2                       |
| AsI                            |         |                            |                            |
| Rb                             | 80      | 109                        | 107                        |
| Sr                             | 390     | 232                        | 263                        |
| Y                              | 33      | 30                         | 27                         |

|    |      |      |      |
|----|------|------|------|
| Zr | 351  | 216  | 229  |
| Nb | 26   | 23   | 17.6 |
| Mo | 2.3  | 5.2  | 2.6  |
| Cd |      |      |      |
| Sn | 4.7  | 5.2  | 8.0  |
| Sb |      |      |      |
| Cs | 11.5 | 9.6  | 10.4 |
| Ba | 594  | 686  | 532  |
| La | 38   | 36   | 28   |
| Ce | 80   | 76   | 59   |
| Pr | 8.9  | 8.5  | 6.8  |
| Nd | 30   | 28   | 23   |
| Sm | 6.0  | 5.4  | 4.8  |
| Eu | 1.8  | 1.4  | 1.4  |
| Gd | 5.6  | 5.0  | 4.5  |
| Tb | 1.0  | 0.9  | 0.8  |
| Dy | 5.4  | 4.8  | 4.4  |
| Ho | 1.2  | 1.0  | 1.0  |
| Er | 3.2  | 2.8  | 2.6  |
| Tm | 0.5  | 0.4  | 0.4  |
| Yb | 3.1  | 2.7  | 2.5  |
| Lu | 0.5  | 0.4  | 0.4  |
| Hf | 8.0  | 5.4  | 5.6  |
| Ta | 1.4  | 1.5  | 1.1  |
| Tl |      |      |      |
| Pb | 11.1 | 10.1 | 7.5  |
| Th | 5.3  | 7.6  | 5.9  |
| U  | 1.6  | 3.2  | 2.0  |

---

Table 4 Lu and Hf isotopic data for zircons from one sample of the Toorongo (sample 406, 37°48'41"S, 146°05'40"E), and two samples from the Tynong pluton (samples 2803-8 and TYN5, 38°03'30"S, 145°37'26"E), Lachlan Orogen, eastern Australia.

| Sample               | Grain/<br>spot # | Total Hf,<br>V | $^{176}\text{Lu}/^{177}\text{Hf}$ | $\pm 2\text{SE}$ | $^{176}\text{Hf}/^{177}\text{Hf}$ | $\pm 2\text{SE}$ | $^{178}\text{Hf}/^{177}\text{Hf}$ | $\varepsilon\text{Hf}(0)$ | Age,<br>Ma | $^{176}\text{Hf}/^{177}\text{Hf}(t)$ | $\varepsilon\text{Hf}(t)$ | $\pm 2\text{SE}$ | $T_{\text{DM}2}$ ,<br>Ga |
|----------------------|------------------|----------------|-----------------------------------|------------------|-----------------------------------|------------------|-----------------------------------|---------------------------|------------|--------------------------------------|---------------------------|------------------|--------------------------|
| <b>sample 406</b>    | 4                | 8.7            | 0.00146                           | 0.00001          | 0.282644                          | 0.000054         | 1.4675                            | -4.5                      | 370        | 0.282634                             | 3.2                       | 1.9              | 1.08                     |
| <b>Toorongo Grd.</b> | 5                | 7.0            | 0.00145                           | 0.00005          | 0.282722                          | 0.000054         | 1.4676                            | -1.8                      | 370        | 0.282712                             | 6.0                       | 1.9              | 0.91                     |
|                      | 6                | 8.7            | 0.00095                           | 0.00002          | 0.282660                          | 0.000050         | 1.4675                            | -4.0                      | 370        | 0.282653                             | 3.9                       | 1.8              | 1.04                     |
|                      | 8                | 7.6            | 0.00146                           | 0.00001          | 0.282617                          | 0.000060         | 1.4674                            | -5.5                      | 370        | 0.282607                             | 2.3                       | 2.1              | 1.14                     |
|                      | 10               | 8.4            | 0.00118                           | 0.00001          | 0.282649                          | 0.000049         | 1.4674                            | -4.3                      | 370        | 0.282641                             | 3.5                       | 1.7              | 1.07                     |
|                      | 12               | 7.6            | 0.00127                           | 0.00001          | 0.282655                          | 0.000053         | 1.4674                            | -4.1                      | 370        | 0.282646                             | 3.7                       | 1.9              | 1.06                     |
|                      | 13               | 10.0           | 0.00100                           | 0.00002          | 0.282519                          | 0.000046         | 1.4674                            | -8.9                      | 370        | 0.282512                             | -1.1                      | 1.6              | 1.35                     |
|                      | 14               | 6.8            | 0.00326                           | 0.00003          | 0.282785                          | 0.000062         | 1.4674                            | 0.5                       | 370        | 0.282762                             | 7.8                       | 2.2              | 0.80                     |
|                      | 15               | 8.6            | 0.00123                           | 0.00001          | 0.282578                          | 0.000052         | 1.4674                            | -6.9                      | 370        | 0.282570                             | 1.0                       | 1.8              | 1.22                     |
|                      | 17               | 8.5            | 0.00122                           | 0.00002          | 0.282638                          | 0.000055         | 1.4675                            | -4.7                      | 370        | 0.282630                             | 3.1                       | 1.9              | 1.09                     |
|                      | 18               | 7.6            | 0.00180                           | 0.00005          | 0.282726                          | 0.000055         | 1.4675                            | -1.6                      | 370        | 0.282714                             | 6.1                       | 1.9              | 0.91                     |
|                      | 22               | 7.0            | 0.00139                           | 0.00004          | 0.282646                          | 0.000059         | 1.4674                            | -4.5                      | 370        | 0.282636                             | 3.3                       | 2.1              | 1.08                     |
|                      | 24               | 8.6            | 0.00209                           | 0.00001          | 0.282665                          | 0.000053         | 1.4675                            | -3.8                      | 370        | 0.282651                             | 3.8                       | 1.9              | 1.05                     |
|                      | 31               | 9.0            | 0.00099                           | 0.00001          | 0.282729                          | 0.000048         | 1.4675                            | -1.5                      | 370        | 0.282722                             | 6.4                       | 1.7              | 0.89                     |
|                      | 35               | 7.3            | 0.00179                           | 0.00002          | 0.282686                          | 0.000059         | 1.4675                            | -3.0                      | 370        | 0.282674                             | 4.7                       | 2.1              | 1.00                     |
|                      | 38               | 6.2            | 0.00145                           | 0.00001          | 0.282660                          | 0.000062         | 1.4674                            | -4.0                      | 370        | 0.282650                             | 3.8                       | 2.2              | 1.05                     |
|                      | 44               | 8.8            | 0.00108                           | 0.00002          | 0.282670                          | 0.000053         | 1.4675                            | -3.6                      | 370        | 0.282663                             | 4.3                       | 1.9              | 1.02                     |
| <b>sample 2803-8</b> | 2                | 9.2            | 0.00157                           | 0.00006          | 0.282801                          | 0.000048         | 1.4675                            | 1.0                       | 370        | 0.282790                             | 8.8                       | 1.7              | 0.74                     |
| <b>Tynong Grd.</b>   | 3                | 7.9            | 0.00227                           | 0.00003          | 0.282769                          | 0.000053         | 1.4674                            | -0.1                      | 370        | 0.282753                             | 7.5                       | 1.9              | 0.82                     |
|                      | 4                | 9.7            | 0.00125                           | 0.00001          | 0.282732                          | 0.000055         | 1.4675                            | -1.4                      | 370        | 0.282723                             | 6.4                       | 1.9              | 0.89                     |
|                      | 6                | 10.4           | 0.00087                           | 0.00003          | 0.282720                          | 0.000051         | 1.4675                            | -1.8                      | 370        | 0.282714                             | 6.1                       | 1.8              | 0.91                     |
|                      | 7                | 10.2           | 0.00131                           | 0.00002          | 0.282678                          | 0.000048         | 1.4675                            | -3.3                      | 370        | 0.282669                             | 4.5                       | 1.7              | 1.01                     |
|                      | 8                | 8.4            | 0.00195                           | 0.00003          | 0.282741                          | 0.000054         | 1.4675                            | -1.1                      | 370        | 0.282728                             | 6.6                       | 1.9              | 0.88                     |
|                      | 10               | 9.1            | 0.00160                           | 0.00005          | 0.282729                          | 0.000048         | 1.4674                            | -1.5                      | 370        | 0.282718                             | 6.2                       | 1.7              | 0.90                     |
|                      | 11               | 9.4            | 0.00167                           | 0.00002          | 0.282783                          | 0.000049         | 1.4675                            | 0.4                       | 370        | 0.282771                             | 8.1                       | 1.7              | 0.78                     |
|                      | 13               | 7.1            | 0.00167                           | 0.00002          | 0.282777                          | 0.000054         | 1.4675                            | 0.2                       | 370        | 0.282765                             | 7.9                       | 1.9              | 0.80                     |

|                                  |      |      |         |         |          |          |        |      |     |          |     |     |      |
|----------------------------------|------|------|---------|---------|----------|----------|--------|------|-----|----------|-----|-----|------|
|                                  | 14   | 10.7 | 0.00114 | 0.00002 | 0.282740 | 0.000048 | 1.4675 | -1.1 | 370 | 0.282732 | 6.7 | 1.7 | 0.87 |
|                                  | 16   | 9.9  | 0.00121 | 0.00003 | 0.282752 | 0.000046 | 1.4675 | -0.7 | 370 | 0.282744 | 7.1 | 1.6 | 0.84 |
|                                  | 17   | 11.1 | 0.00186 | 0.00004 | 0.282775 | 0.000053 | 1.4676 | 0.1  | 370 | 0.282762 | 7.8 | 1.9 | 0.80 |
|                                  | 18   | 8.4  | 0.00094 | 0.00002 | 0.282760 | 0.000048 | 1.4675 | -0.4 | 370 | 0.282754 | 7.5 | 1.7 | 0.82 |
|                                  | 20   | 9.7  | 0.00172 | 0.00005 | 0.282749 | 0.000054 | 1.4675 | -0.8 | 370 | 0.282737 | 6.9 | 1.9 | 0.86 |
|                                  | 21   | 9.4  | 0.00130 | 0.00003 | 0.282717 | 0.000051 | 1.4675 | -1.9 | 370 | 0.282708 | 5.9 | 1.8 | 0.92 |
|                                  | 22   | 7.1  | 0.00159 | 0.00003 | 0.282794 | 0.000062 | 1.4676 | 0.8  | 370 | 0.282783 | 8.5 | 2.2 | 0.76 |
|                                  | 25   | 8.4  | 0.00116 | 0.00003 | 0.282703 | 0.000048 | 1.4675 | -2.4 | 370 | 0.282695 | 5.4 | 1.7 | 0.95 |
|                                  | 26   | 7.8  | 0.00255 | 0.00014 | 0.282783 | 0.000064 | 1.4675 | 0.4  | 370 | 0.282765 | 7.9 | 2.2 | 0.80 |
|                                  | 27   | 10.2 | 0.00134 | 0.00003 | 0.282738 | 0.000048 | 1.4675 | -1.2 | 370 | 0.282729 | 6.6 | 1.7 | 0.88 |
|                                  | 32   | 9.1  | 0.00156 | 0.00003 | 0.282764 | 0.000060 | 1.4675 | -0.3 | 370 | 0.282753 | 7.5 | 2.1 | 0.82 |
|                                  | 33   | 9.5  | 0.00133 | 0.00001 | 0.282738 | 0.000050 | 1.4676 | -1.2 | 370 | 0.282729 | 6.6 | 1.8 | 0.88 |
|                                  | 34   | 8.5  | 0.00120 | 0.00002 | 0.282761 | 0.000052 | 1.4675 | -0.4 | 370 | 0.282753 | 7.5 | 1.8 | 0.82 |
|                                  | 36   | 10.0 | 0.00090 | 0.00001 | 0.282671 | 0.000050 | 1.4675 | -3.6 | 370 | 0.282665 | 4.3 | 1.8 | 1.02 |
| sample<br>TYN5<br>Tynong<br>Grd. | 1    | 5.7  | 0.00133 | 0.00003 | 0.282704 | 0.000094 | 1.4676 | -2.4 | 370 | 0.282695 | 5.4 | 3.3 | 0.95 |
|                                  | 2    | 4.2  | 0.00154 | 0.00001 | 0.282710 | 0.000110 | 1.4677 | -2.2 | 370 | 0.282699 | 5.6 | 3.9 | 0.94 |
|                                  | 3    | 4.2  | 0.00171 | 0.00003 | 0.282692 | 0.000094 | 1.4675 | -2.8 | 370 | 0.282680 | 4.9 | 3.3 | 0.98 |
|                                  | 4.1  | 5.3  | 0.00174 | 0.00002 | 0.282702 | 0.000088 | 1.4675 | -2.5 | 370 | 0.282690 | 5.2 | 3.1 | 0.96 |
|                                  | 4.2  | 5.7  | 0.00153 | 0.00002 | 0.282651 | 0.000080 | 1.4676 | -4.3 | 370 | 0.282640 | 3.5 | 2.8 | 1.07 |
|                                  | 5    | 4.6  | 0.00129 | 0.00001 | 0.282662 | 0.000091 | 1.4676 | -3.9 | 370 | 0.282653 | 3.9 | 3.2 | 1.04 |
|                                  | 6    | 4.6  | 0.00394 | 0.00004 | 0.282641 | 0.000099 | 1.4675 | -4.6 | 370 | 0.282614 | 2.5 | 3.5 | 1.13 |
|                                  | 7.1  | 5.9  | 0.00190 | 0.00001 | 0.282705 | 0.000076 | 1.4677 | -2.4 | 370 | 0.282692 | 5.3 | 2.7 | 0.96 |
|                                  | 7.2  | 4.9  | 0.00196 | 0.00001 | 0.282583 | 0.000082 | 1.4675 | -6.7 | 370 | 0.282569 | 1.0 | 2.9 | 1.22 |
|                                  | 8    | 4.4  | 0.00150 | 0.00003 | 0.282677 | 0.000099 | 1.4676 | -3.4 | 370 | 0.282667 | 4.4 | 3.5 | 1.01 |
|                                  | 9    | 3.3  | 0.00698 | 0.00016 | 0.282770 | 0.000150 | 1.4675 | -0.1 | 370 | 0.282722 | 6.4 | 5.3 | 0.89 |
|                                  | 10   | 4.9  | 0.00199 | 0.00005 | 0.282657 | 0.000079 | 1.4676 | -4.1 | 370 | 0.282643 | 3.6 | 2.8 | 1.06 |
|                                  | 11.2 | 4.0  | 0.00147 | 0.00002 | 0.282610 | 0.000100 | 1.4675 | -5.7 | 370 | 0.282600 | 2.0 | 3.5 | 1.16 |
|                                  | 11.1 | 4.7  | 0.00125 | 0.00001 | 0.282680 | 0.000100 | 1.4675 | -3.3 | 370 | 0.282671 | 4.6 | 3.5 | 1.00 |
|                                  | 12   | 3.9  | 0.00284 | 0.00003 | 0.282780 | 0.000110 | 1.4677 | 0.3  | 370 | 0.282760 | 7.7 | 3.9 | 0.81 |
|                                  | 13   | 4.1  | 0.00155 | 0.00002 | 0.282690 | 0.000110 | 1.4677 | -2.9 | 370 | 0.282679 | 4.9 | 3.9 | 0.98 |
|                                  | 14   | 4.2  | 0.00173 | 0.00003 | 0.282656 | 0.000092 | 1.4676 | -4.1 | 370 | 0.282644 | 3.6 | 3.3 | 1.06 |

|      |     |         |         |          |          |        |      |     |          |      |     |      |
|------|-----|---------|---------|----------|----------|--------|------|-----|----------|------|-----|------|
| 15.1 | 4.1 | 0.00243 | 0.00006 | 0.282700 | 0.000110 | 1.4676 | -2.5 | 370 | 0.282683 | 5.0  | 3.9 | 0.98 |
| 15.2 | 4.1 | 0.00254 | 0.00009 | 0.282790 | 0.000120 | 1.4676 | 0.6  | 370 | 0.282772 | 8.2  | 4.2 | 0.78 |
| 16   | 3.9 | 0.00120 | 0.00001 | 0.282690 | 0.000110 | 1.4676 | -2.9 | 370 | 0.282682 | 4.9  | 3.9 | 0.98 |
| 17   | 3.7 | 0.00184 | 0.00004 | 0.282620 | 0.000120 | 1.4676 | -5.4 | 370 | 0.282607 | 2.3  | 4.2 | 1.14 |
| 18   | 4.5 | 0.00221 | 0.00006 | 0.282710 | 0.000100 | 1.4677 | -2.2 | 370 | 0.282695 | 5.4  | 3.5 | 0.95 |
| 19   | 3.2 | 0.00245 | 0.00003 | 0.282620 | 0.000130 | 1.4676 | -5.4 | 370 | 0.282603 | 2.2  | 4.6 | 1.15 |
| 20.1 | 3.9 | 0.00149 | 0.00001 | 0.282630 | 0.000110 | 1.4676 | -5.0 | 370 | 0.282620 | 2.7  | 3.9 | 1.12 |
| 20.2 | 4.3 | 0.00296 | 0.00009 | 0.282690 | 0.000100 | 1.4676 | -2.9 | 370 | 0.282669 | 4.5  | 3.5 | 1.01 |
| 21   | 3.9 | 0.00288 | 0.00014 | 0.282680 | 0.000110 | 1.4676 | -3.3 | 370 | 0.282660 | 4.2  | 3.9 | 1.03 |
| 22   | 3.7 | 0.00165 | 0.00001 | 0.282530 | 0.000110 | 1.4675 | -8.6 | 370 | 0.282519 | -0.8 | 3.9 | 1.34 |
| 23   | 3.9 | 0.00133 | 0.00004 | 0.282600 | 0.000120 | 1.4676 | -6.1 | 370 | 0.282591 | 1.7  | 4.2 | 1.18 |
| 24.1 | 2.5 | 0.00452 | 0.00004 | 0.282640 | 0.000150 | 1.4676 | -4.7 | 370 | 0.282609 | 2.4  | 5.3 | 1.14 |
| 24.2 | 2.0 | 0.00501 | 0.00007 | 0.282840 | 0.000180 | 1.4676 | 2.4  | 370 | 0.282805 | 9.3  | 6.4 | 0.71 |
| 25   | 3.6 | 0.00110 | 0.00001 | 0.282730 | 0.000110 | 1.4677 | -1.5 | 370 | 0.282722 | 6.4  | 3.9 | 0.89 |
| 26   | 3.5 | 0.00201 | 0.00002 | 0.282690 | 0.000120 | 1.4675 | -2.9 | 370 | 0.282676 | 4.7  | 4.2 | 0.99 |
| 27   | 3.8 | 0.00169 | 0.00007 | 0.282720 | 0.000110 | 1.4677 | -1.8 | 370 | 0.282708 | 5.9  | 3.9 | 0.92 |
| 28   | 3.9 | 0.00132 | 0.00001 | 0.282620 | 0.000100 | 1.4675 | -5.4 | 370 | 0.282611 | 2.4  | 3.5 | 1.13 |

Notes Internal precision (2se) for measured  $^{176}\text{Hf}/^{177}\text{Hf}$  scales inversely with total Hf signal during ablation, and increases sharply for signals <6V Hf. Initial Hf isotope compositions ( $^{176}\text{Hf}/^{177}\text{Hf}(t)$ ,  $\varepsilon_{\text{Hf}}(t)$ ) calculated at 370 Ma, with 2se errors in initial  $\varepsilon_{\text{Hf}}$  approximated by internal (2se) precision for measured (present-day)  $^{176}\text{Hf}/^{177}\text{Hf}$  which are very close to the uncertainties obtained by propagating the errors in measured isotope and Lu/Hf ratios, and age (assumed here to be  $\pm 5$  Ma)

Results for standard zircons obtained in the course of this work

|                           |      | $^{176}\text{Lu}/^{177}\text{Hf}$ | 2sd     | $^{176}\text{Hf}/^{177}\text{Hf}$ | 2sd             | $\epsilon_{\text{Hf}}$ | 2sd |
|---------------------------|------|-----------------------------------|---------|-----------------------------------|-----------------|------------------------|-----|
| <b>91500 (1065 Ma)</b>    |      |                                   |         |                                   |                 |                        |     |
| 24/03/2012                | n=7  | 0.00034                           | 0.00002 | 0.282318                          | 0.000052        | -16.1                  | 1.8 |
| 16/12/2011                | n=7  | 0.00033                           | 0.00002 | 0.282330                          | 0.000135        | -15.6                  | 4.8 |
| <b>reference</b>          |      | <b>0.00031</b>                    |         | <b>0.282306</b>                   | <b>0.000008</b> | <b>-16.5</b>           |     |
| <b>BR266 (560 Ma)</b>     |      |                                   |         |                                   |                 |                        |     |
| 24/03/2011                | n=8  | 0.00022                           | 0.00001 | 0.281651                          | 0.000057        | -39.6                  | 2.0 |
| <b>reference</b>          |      | <b>0.00022</b>                    |         | <b>0.281630</b>                   | <b>0.00001</b>  | <b>-40.4</b>           |     |
| <b>Temora-2 (417 Ma)</b>  |      |                                   |         |                                   |                 |                        |     |
| 16/12/2011                | n=11 | 0.00117                           | 0.00062 | 0.282681                          | 0.000070        | -3.2                   | 2.5 |
| <b>reference</b>          |      | <b>0.00109</b>                    |         | <b>0.282686</b>                   | <b>0.000008</b> | <b>-3.0</b>            |     |
| <b>Plesovice (337 Ma)</b> |      |                                   |         |                                   |                 |                        |     |
| 16/12/2011                | n=5  | 0.00012                           | 0.00002 | 0.282496                          | 0.000027        | -9.8                   | 1.0 |
| <b>reference</b>          |      | <b>0.00013</b>                    |         | <b>0.282482</b>                   | <b>0.000013</b> | <b>-10.3</b>           |     |

---

Zircon reference values from Woodhead & Hergt (2005) and Slama et al (2008)
